# Supplementary material for: SBA-15- and SBA-16-Functionalized Silicas as New Carriers of Niacinamide
Source: MDPI journal article supplement (doi:10.3390/ijms242417567), 2023-12-17
Supplement: s1 [file s1]

## SUPPORTING MATERIALS

### SBA-15 and SBA-16 functionalized silicas as new carriers of niacinamide

Agata Wawrzyńczak<sup>1</sup>, Izabela Nowak<sup>1</sup>, Agnieszka Feliczak-Guzik<sup>1\*</sup>

<sup>1</sup>Adam Mickiewicz University, Faculty of Chemistry, Uniwersytetu Poznańskiego 8, 61-614 Poznań, Poland

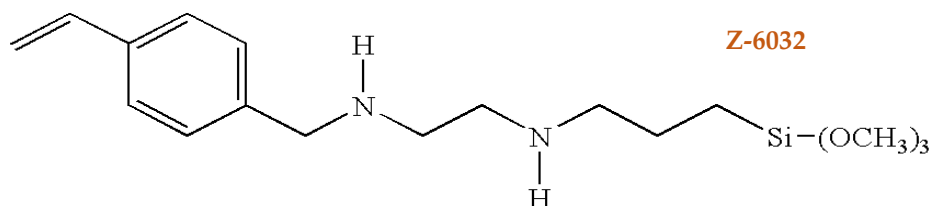

**Figure S1.** The chemical structure of (N-Vinylbenzyl)aminoethylaminopropyltrimethoxysilane (Z-6032).

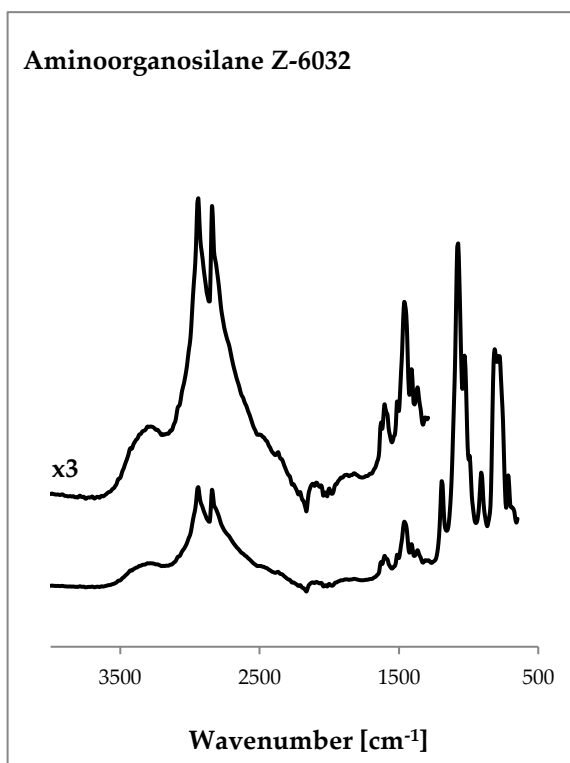

**Figure S2.** FT-IR spectra of Z-6032 aminoorganosilane.

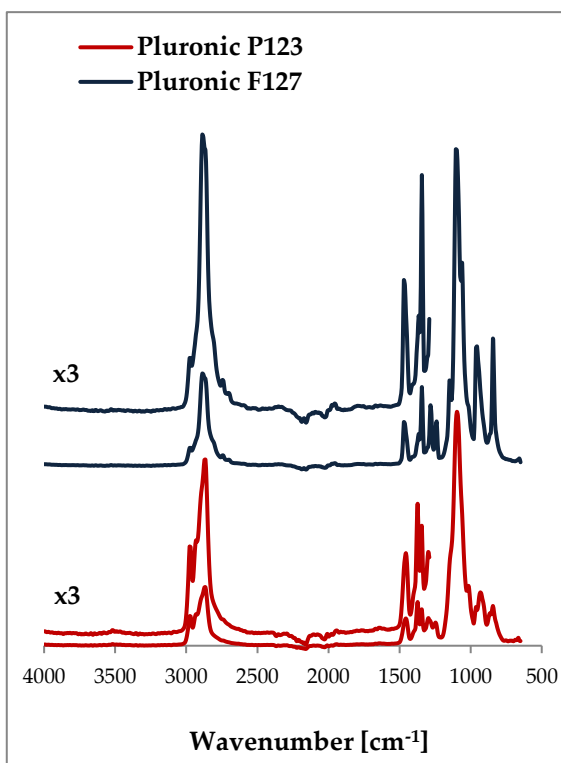

**Figure S3.** FT-IR spectra of Pluronic P123 and Pluronic F127.

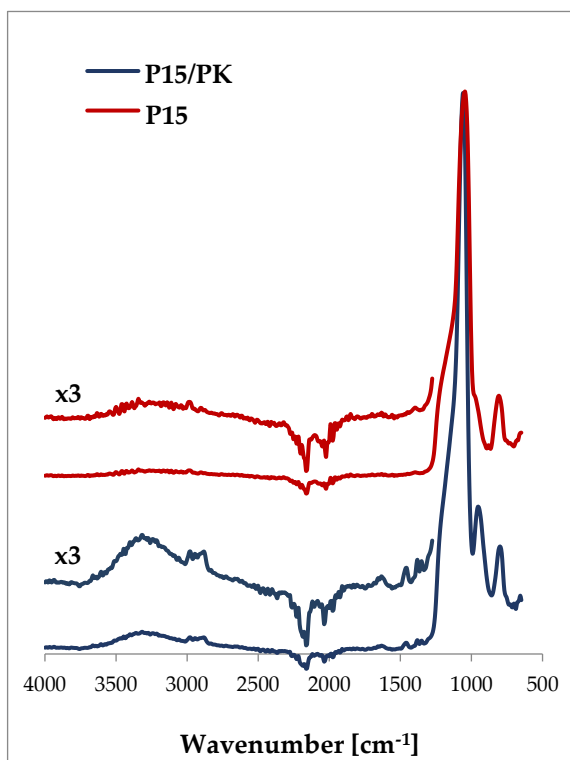

**Figure S4.** FT-IR spectra of as-synthesized and calcined SBA-15 materials.

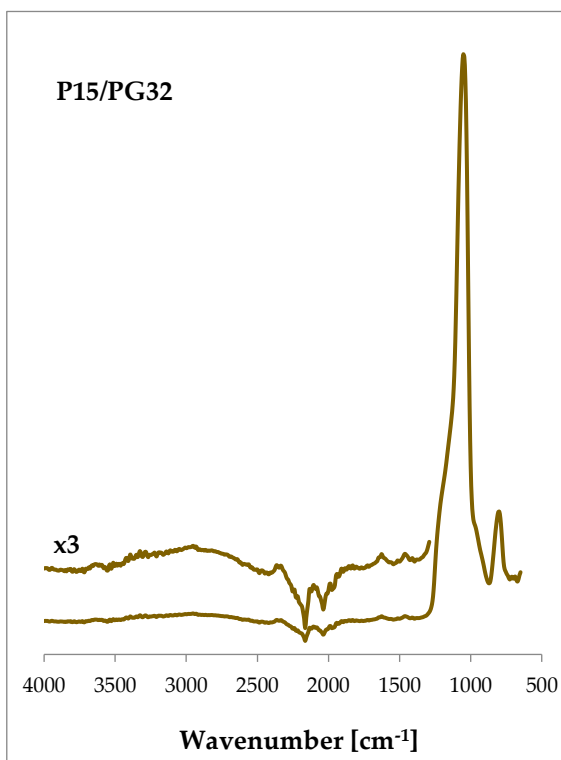

**Figure S5.** FT-IR spectra of SBA-15 material functionalized by grafting of Z-6032 aminoorganosilane.

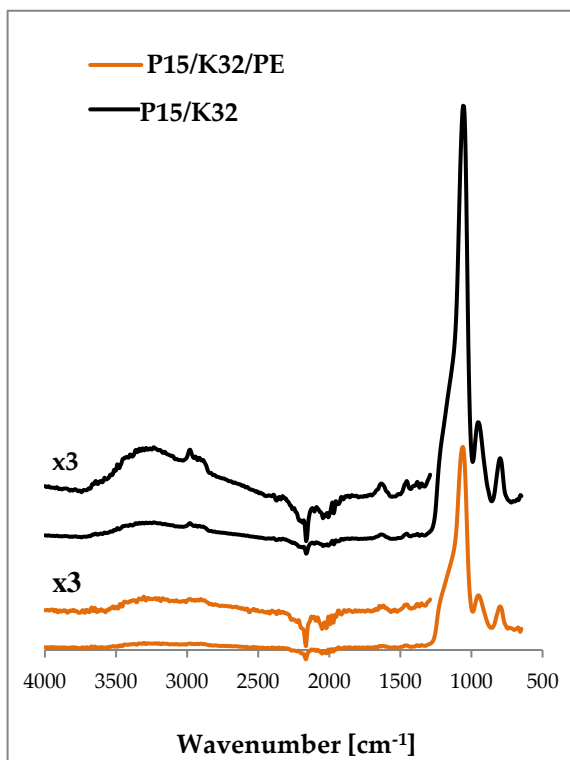

**Figure S6.** FT-IR spectra of as-synthesized and extracted SBA-15 materials functionalized with Z-6032 aminoorganosilane introduced by co-condensation.

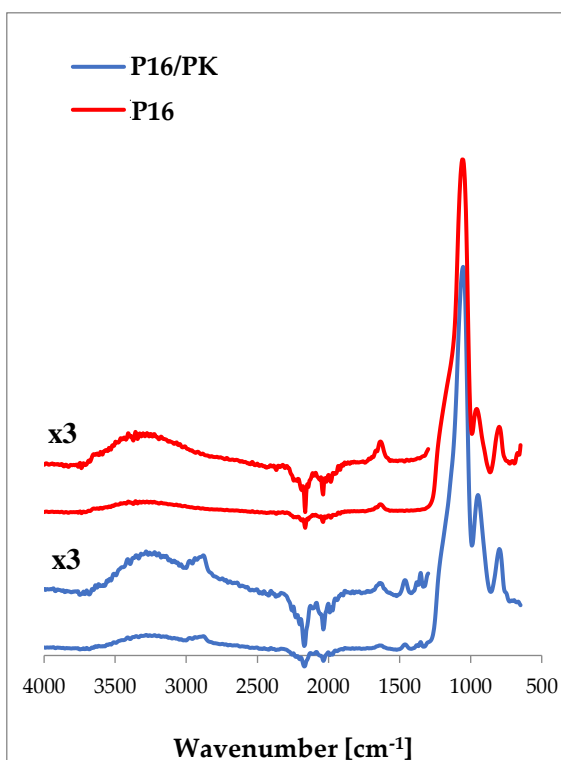

**Figure S7.** FT-IR spectra of as-synthesized and calcined SBA-16 materials.

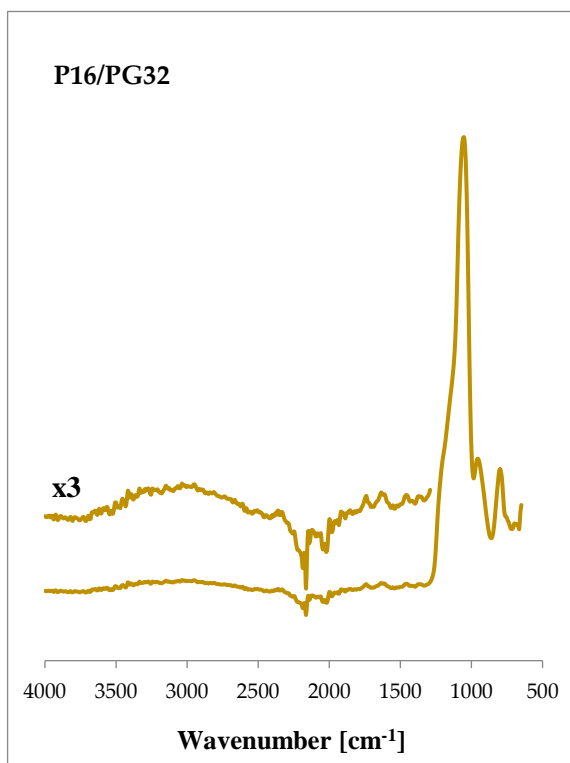

**Figure S8.** FT-IR spectra of as-synthesized and extracted SBA-16 materials functionalized with Z-6032 aminoorganosilane introduced by co-condensation.

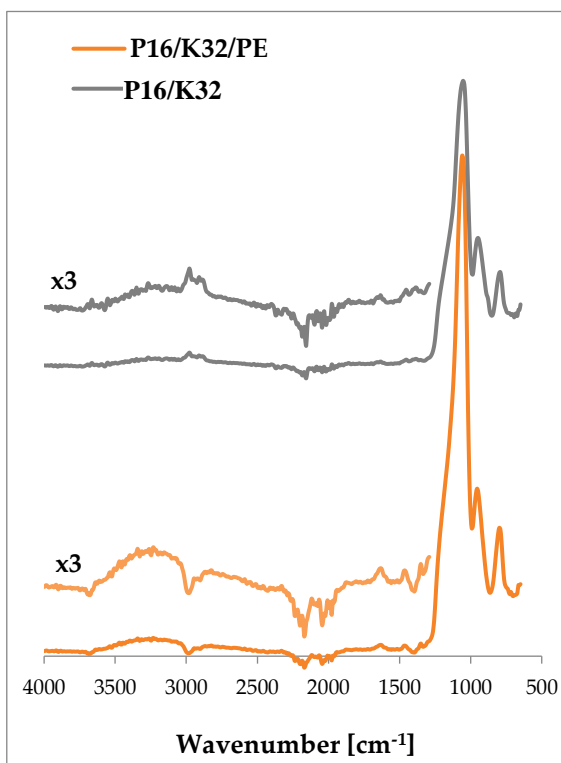

**Figure S9.** FT-IR spectra of SBA-16 material functionalized by grafting of Z-6032 aminoorganosilane.

A)

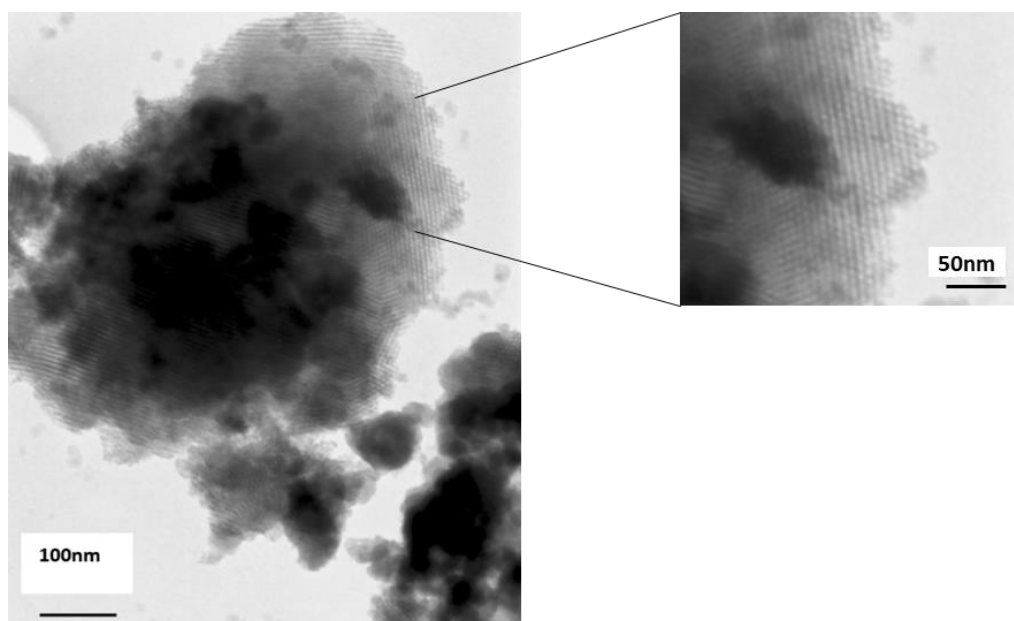

B)

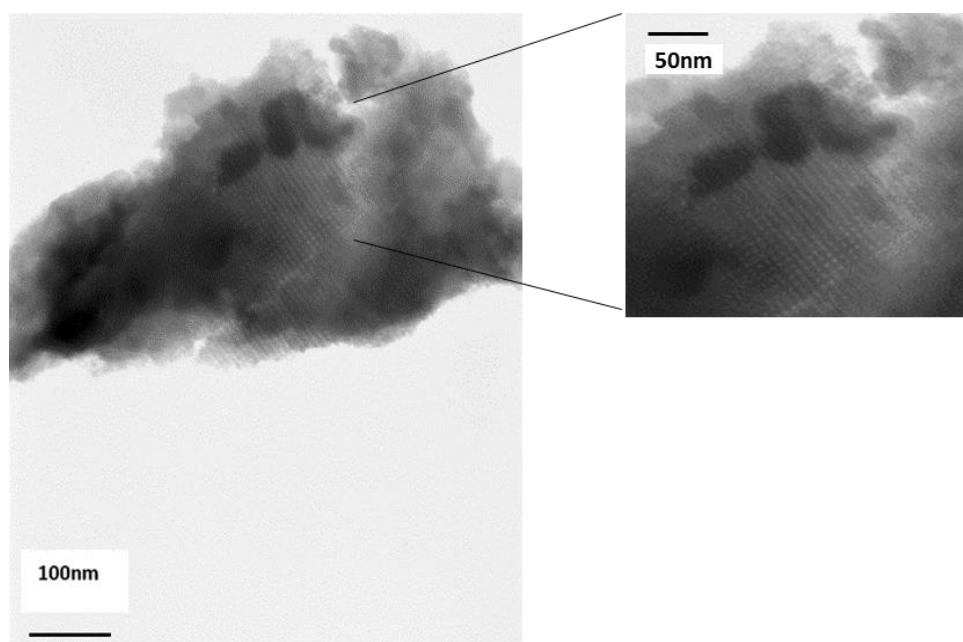

C)

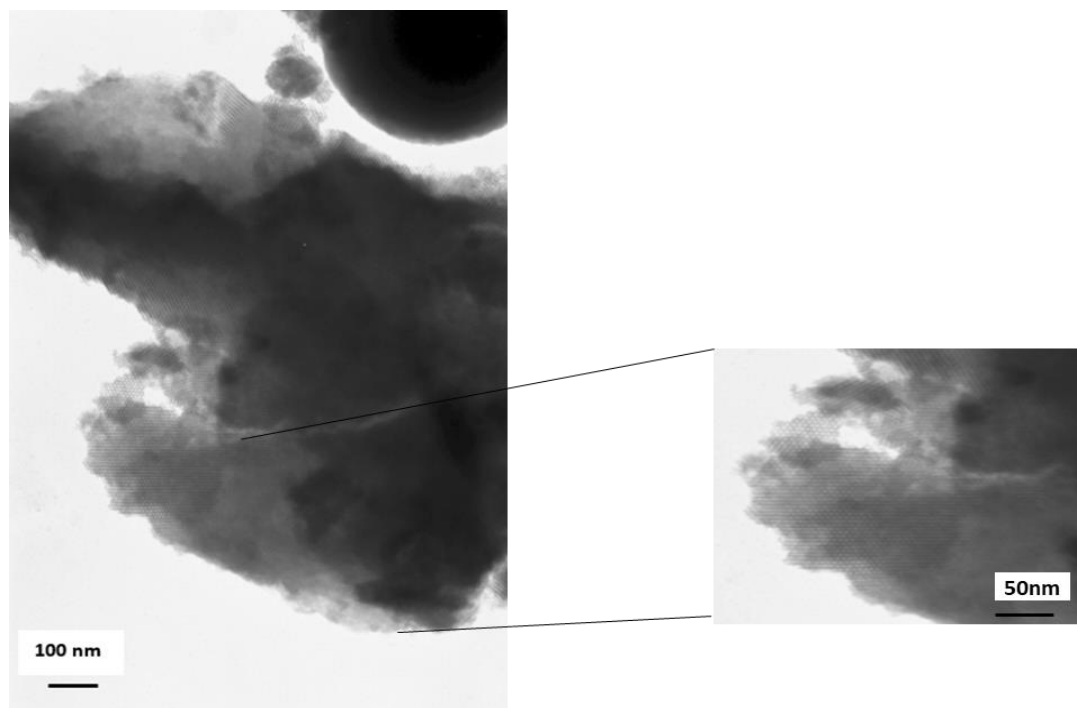

D)

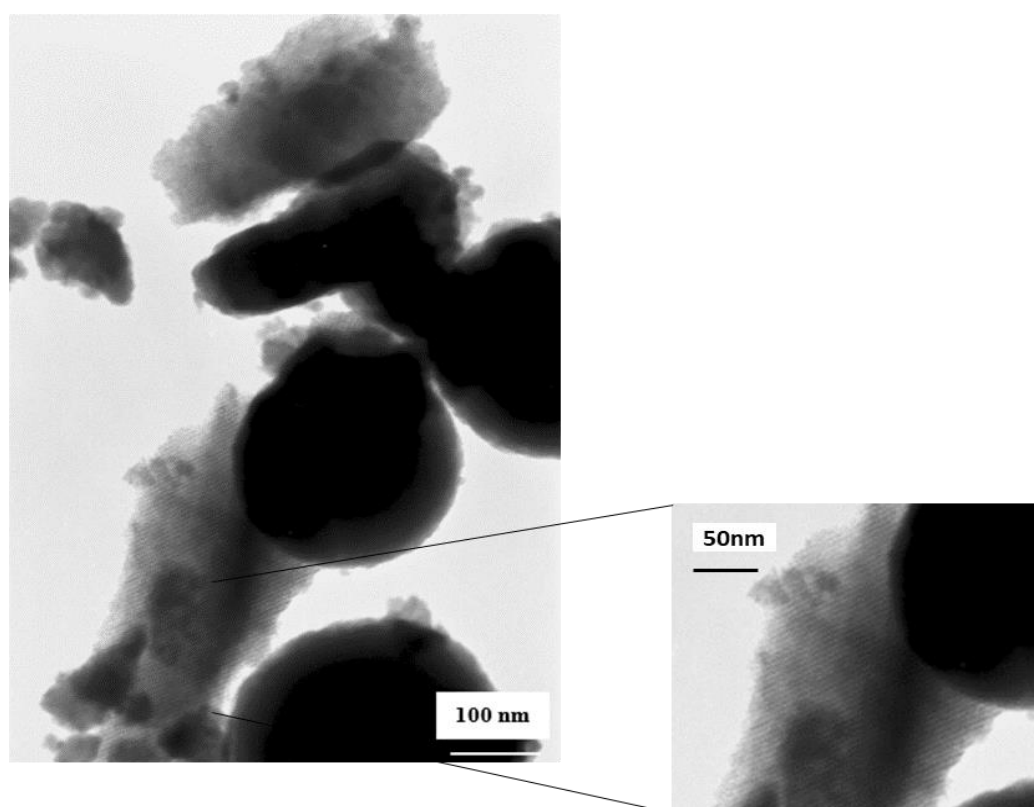

**Figure S10.** TEM photographs for: A) pristine SBA-15 material (P15/K); B) pristine SBA-16 material (P16/K); C) SBA-15 grafted with Z-6032 (P15/PG32); D) SBA-16 grafted with Z-6032 (P16/PG32).

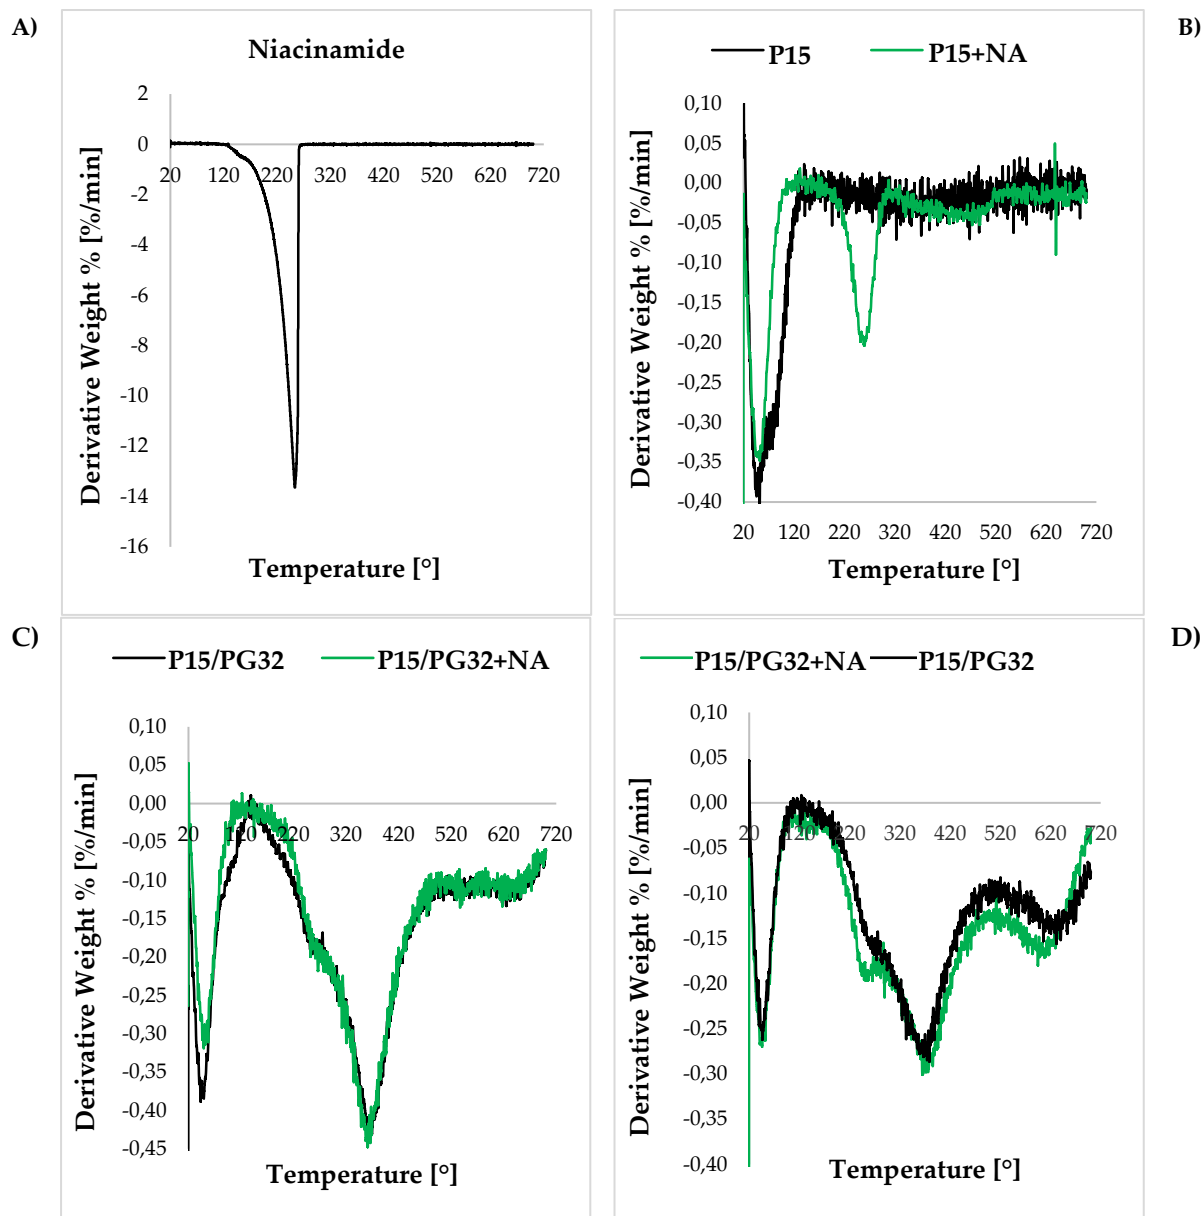

**Figure S11.** Results of thermogravimetric analysis of: A) niacinamide; B) pristine SBA-15 and loaded with niacinamide; C) SBA-15 modified with aminoorganosilane Z-6032 introduced by co-condensation and loaded with niacinamide; D) SBA-15 modified with aminoorganosilane Z-6032 introduced by grafting and loaded with niacinamide.

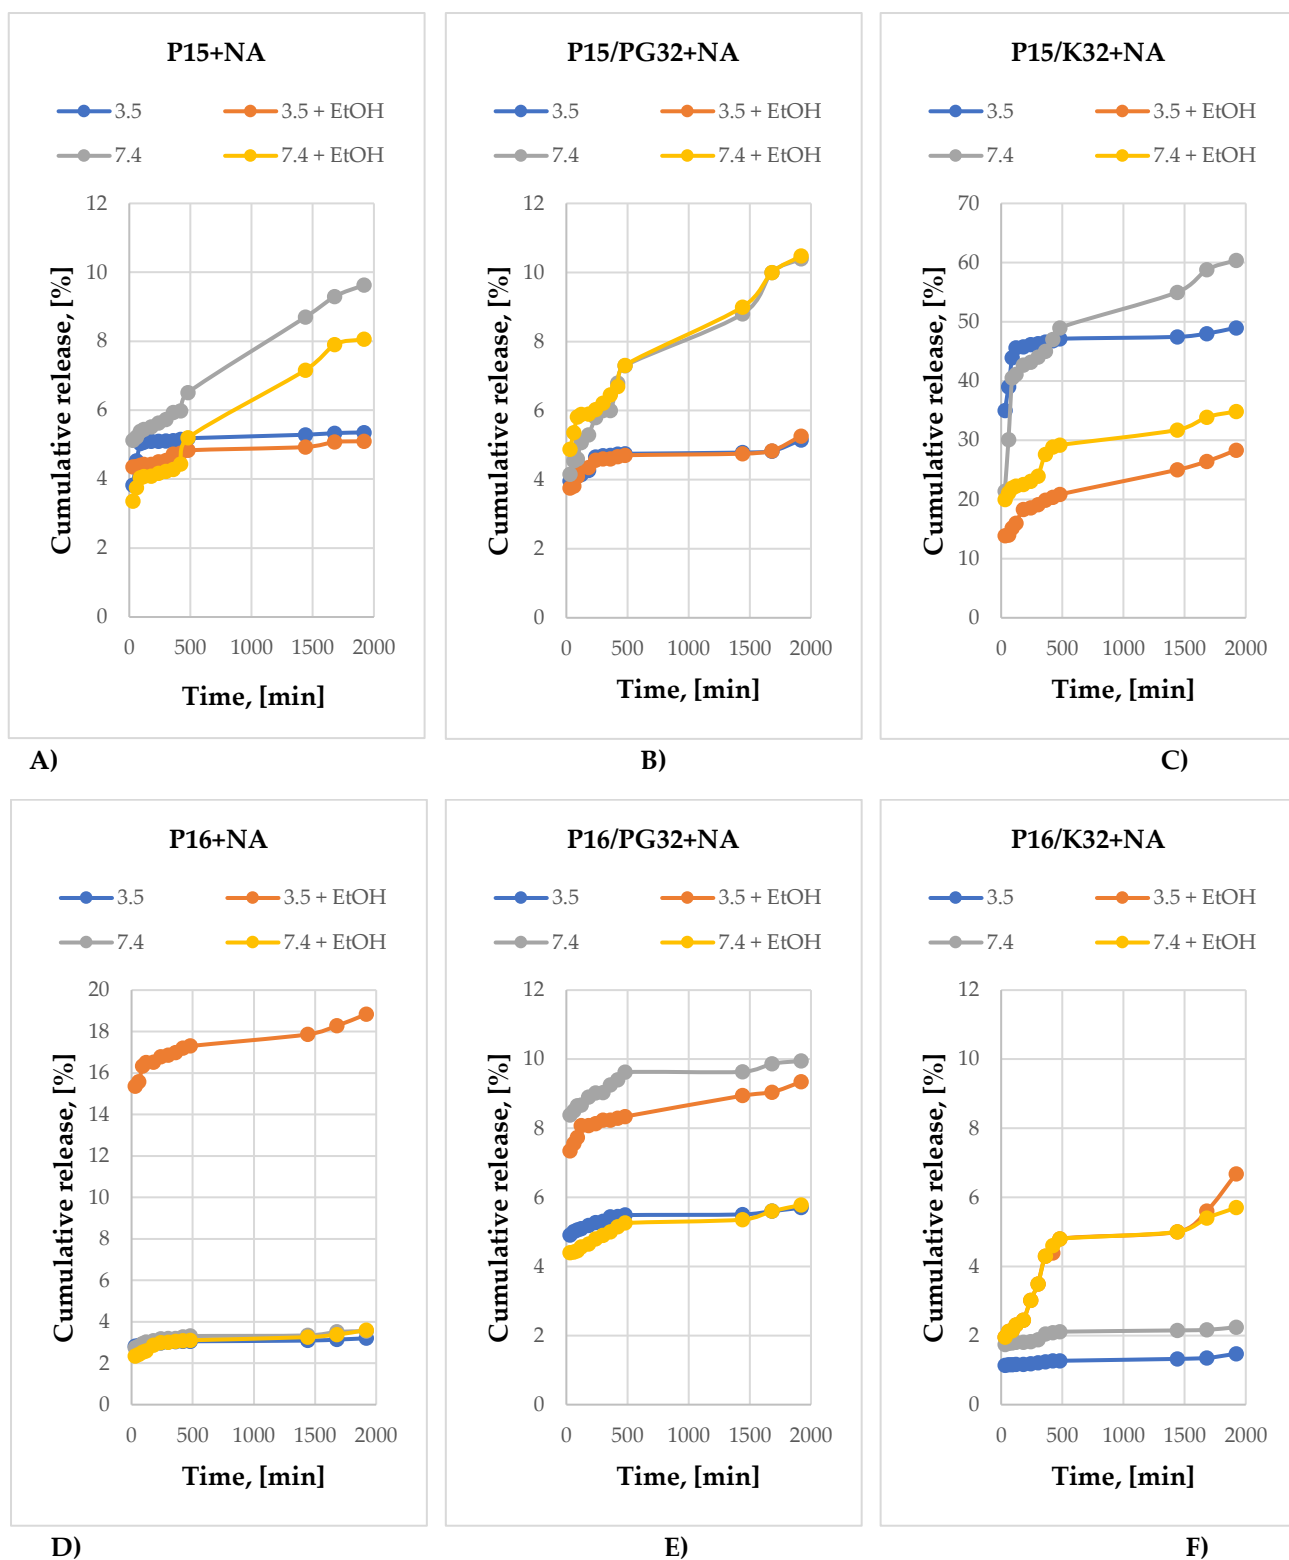

**Figure S12.** Niacynamide release profiles from mesoporous silica-based materials into acceptor fluids with different pH values.
